# Supplementary material for: Celecoxib Treatment Alters the Gene Expression Profile of Normal Colonic Mucosa
Source: Oxford University Press journal article supplement (doi:10.1158/1055-9965.epi-04-0866), 2006-07-01
Supplement: 10559965epi040866-sup-cebp_7-1-2006_kirsch_table_5.pdf [file 10559965epi040866-sup-cebp_7-1-2006_kirsch_table_5.pdf]

**Supplement, Table 5. Biological Processes targeted by changes in gene expression in Celecoxib-treated patients**

| Gene Ontology Category <sup>a</sup>                                      | Number of Significant Genes in a Category <sup>b</sup> | Number of Genes on Array in a Category <sup>c</sup> | EASE Score |
|--------------------------------------------------------------------------|--------------------------------------------------------|-----------------------------------------------------|------------|
| cell communication                                                       | 342 (35)                                               | 1610                                                | 0.0002     |
| immune response                                                          | 103 (7)                                                | 421                                                 | 0.0008     |
| lymphocyte activation                                                    | 16 (1)                                                 | 36                                                  | 0.0009     |
| response to stress                                                       | 116 (6)                                                | 489                                                 | 0.0013     |
| response to pest/pathogen/parasite                                       | 71 (3)                                                 | 275                                                 | 0.0014     |
| defense response                                                         | 110 (7)                                                | 462                                                 | 0.0015     |
| ER to Golgi transport                                                    | 10 (1)                                                 | 18                                                  | 0.0022     |
| immune cell activation                                                   | 17 (1)                                                 | 43                                                  | 0.0025     |
| cell activation                                                          | 17 (1)                                                 | 43                                                  | 0.0025     |
| response to wounding                                                     | 45 (3)                                                 | 166                                                 | 0.0047     |
| response to biotic stimulus                                              | 115 (7)                                                | 508                                                 | 0.0070     |
| cell-cell signaling                                                      | 67 (7)                                                 | 274                                                 | 0.0077     |
| cell adhesion                                                            | 77 (4)                                                 | 327                                                 | 0.0111     |
| cellular process                                                         | 634 (73)                                               | 3283                                                | 0.0114     |
| T-cell activation                                                        | 9 (1)                                                  | 19                                                  | 0.0134     |
| B-cell activation                                                        | 9 (1)                                                  | 19                                                  | 0.0134     |
| regulation of apoptosis                                                  | 37 (2)                                                 | 141                                                 | 0.0181     |
| signal transduction                                                      | 260 (31)                                               | 1277                                                | 0.0186     |
| TGFbeta receptor signaling pathway                                       | 10 (2)                                                 | 24                                                  | 0.0205     |
| cell-cell adhesion                                                       | 28 (1)                                                 | 101                                                 | 0.0213     |
| transcription\, DNA-dependent                                            | 197 (23)                                               | 951                                                 | 0.0224     |
| response to external stimulus                                            | 154 (13)                                               | 728                                                 | 0.0226     |
| response to chemical substance                                           | 35 (5)                                                 | 134                                                 | 0.0232     |
| transmembrane receptor protein serine/threonine kinase signaling pathway | 11 (2)                                                 | 29                                                  | 0.0274     |
| cellular defense response                                                | 17 (1)                                                 | 54                                                  | 0.0276     |
| protein kinase cascade                                                   | 27 (3)                                                 | 100                                                 | 0.0327     |
| regulation of transcription\, DNA-dependent                              | 188 (22)                                               | 914                                                 | 0.0333     |
| transcription                                                            | 202 (23)                                               | 990                                                 | 0.0367     |
| regulation of transcription                                              | 191 (22)                                               | 933                                                 | 0.0378     |

|                        |        |     |        |
|------------------------|--------|-----|--------|
| cell death             | 59 (3) | 257 | 0.0419 |
| death                  | 59 (3) | 257 | 0.0419 |
| chemotaxis             | 20 (2) | 71  | 0.0476 |
| taxis                  | 20 (2) | 71  | 0.0476 |
| innate immune response | 29 (2) | 113 | 0.0486 |

<sup>a</sup>Categories are sorted by EASE score

<sup>b</sup>Total number of significant by SAM genes that have been Categorized in Gene Ontology is 1106; the number of genes in a category, which changes in expression are significant at  $p < 0.001$ , is shown in brackets (out of 125 that have been categorized)

<sup>c</sup>Total number of genes presented on arrays that have been Categorized in Gene Ontology is 6062
