# Supplementary material for: Celecoxib Treatment Alters the Gene Expression Profile of Normal Colonic Mucosa
Source: Oxford University Press journal article supplement (doi:10.1158/1055-9965.epi-04-0866), 2006-07-01
Supplement: 10559965epi040866-sup-cebp_7-1-2006_kirsch_table_7.pdf [file 10559965epi040866-sup-cebp_7-1-2006_kirsch_table_7.pdf]

**Supplement, Table 7. Cellular Components targeted by changes in gene expression in Celecoxib-treated patients**

| Gene Ontology Category <sup>a</sup> | Number of Significant Genes in a Category <sup>b</sup> | Number of Genes on Array in a Category <sup>c</sup> | EASE Score |
|-------------------------------------|--------------------------------------------------------|-----------------------------------------------------|------------|
| extracellular                       | 137 (13)                                               | 628                                                 | 0.0116     |
| integral to plasma membrane         | 147 (13)                                               | 680                                                 | 0.0122     |
| integral to membrane                | 297 (29)                                               | 1494                                                | 0.0359     |
| plasma membrane                     | 199 (16)                                               | 976                                                 | 0.0380     |
| extracellular matrix                | 39 (2)                                                 | 160                                                 | 0.0447     |
| membrane fraction                   | 72 (6)                                                 | 332                                                 | 0.0732     |
| coated vesicle                      | 13 (2)                                                 | 45                                                  | 0.1036     |

<sup>a</sup>Categories are sorted by EASE score

<sup>b</sup>Total number of significant by SAM genes that have been Categorized in Gene Ontology is 1087; the number of genes in a category, which changes in expression are significant at  $p < 0.001$ , is shown in brackets (out of 120 that have been categorized)

<sup>c</sup>Total number of genes presented on arrays that have been Categorized in Gene Ontology is 5962
